# Supplementary material for: Intravascular Imaging-Guided Versus Coronary Angiography-Guided Complex PCI: A Meta-analysis of Randomized Controlled Trials
Source: PubMed Central journal article supplement — Cardiol Ther. 2024 Apr 17;13(2):379–99. doi: 10.1007/s40119-024-00364-7 (PMC11093926; doi:10.1007/s40119-024-00364-7), 2024-04-17

## **Intravascular Imaging-Guided Versus Coronary Angiography-Guided Complex PCI: A Meta-Analysis of Randomized Controlled Trials**

Mohamed Hamed, MD <sup>a</sup>, Sheref Mohamed, MD <sup>b</sup>, Mohamed Mahmoud, MD <sup>c</sup>, Jonathan Kahan, MD <sup>a</sup>, Amr Mohsen, MD <sup>d</sup>, Faisal Rahman, MD <sup>e</sup>, Waleed Kayani, MD <sup>f</sup>, Fernando Alfonso, MD PhD <sup>g</sup>, Emmanuel S. Brilakis, MD PhD <sup>h</sup>, Islam Y. Elgendy, MD <sup>i</sup>, Mamas A. Mamas, MD <sup>j</sup>, Ayman Elbadawi, MD PhD <sup>k,l</sup>

<sup>a</sup> Division of Cardiology, Florida Atlantic University, Boca Raton, FL, USA

<sup>b</sup> Department of Cardiology, Ain Shams University, Cairo, Egypt

<sup>c</sup> Division of Cardiology, University of Texas Health Science Center at Houston, Houston, TX, USA

<sup>d</sup> Division of Cardiology, Loma Linda University, Loma Linda, CA, USA

<sup>e</sup> Division of Cardiology, John Hopkins University, Baltimore, MD, USA

<sup>f</sup> Division of Cardiology, Baylor College of Medicine, Houston, TX, USA

<sup>g</sup> Department of Cardiology, Hospital Universitario de La Princesa, IIS-IP, CIBER-CV, Madrid, Spain

<sup>h</sup> Division of Cardiology, Minneapolis Heart Institute, Minneapolis, MN, USA.

<sup>i</sup> Division of Cardiovascular Medicine, Gill Heart Institute, University of Kentucky, Lexington, KY, USA

<sup>j</sup> Keele Cardiovascular Research Group, Keele University, Keele, UK

<sup>k</sup> Division of Cardiology, Christus Good Shepherd Medical Center, Longview, TX.

<sup>l</sup> Texas A&M School of Medicine, Bryan, TX

Correspondence to:

Ayman Elbadawi, MD PhD MSc FACC

Division of Cardiology

Texas A&M School of Medicine,

Christus Good Shepherd Medical Center, Longview, TX.

Email: [aymangalal24@hotmail.com](mailto:aymangalal24@hotmail.com)

## Supplemental Table 1

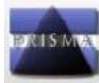

### PRISMA 2020 CHECKLIST

| Section and Topic                | Item# | Checklist item                                                                                                                                                   | Pages where item is reported |
|----------------------------------|-------|------------------------------------------------------------------------------------------------------------------------------------------------------------------|------------------------------|
| <b>TITLE</b>                     |       |                                                                                                                                                                  |                              |
| Title                            | 1     | Identify the report as a systematic review .                                                                                                                     | 1                            |
| <b>ABSTRACT</b>                  |       |                                                                                                                                                                  |                              |
| Abstract                         | 2     | See the PRISMA 2020 for Abstracts checklist.                                                                                                                     | 2                            |
| <b>INTRODUCTION</b>              |       |                                                                                                                                                                  |                              |
| Overview                         | 3     | Overview on the recent data and current evidence                                                                                                                 | 3                            |
| Rationale                        | 4     | Describe the rationale for the review in the context of existing knowledge.                                                                                      | 3                            |
| Objectives                       | 5     | Provide a clear statement of the objectives of the review                                                                                                        | 3                            |
| <b>METHODS</b>                   |       |                                                                                                                                                                  |                              |
| Data sources and Search strategy | 6     | Provide the full search strategies that includes all databases, websites and prior meta-analyses including search terms used.                                    | 3-4                          |
| Eligibility criteria             | 7     | Specify the inclusion and exclusion criteria for the review and how studies were grouped for the syntheses.                                                      | 4                            |
| Data extraction                  | 8     | Specify the number of investigators and how the data was extracted, whether they work independently, and the process of confirming data from study investigators | 4                            |
| Outcomes                         | 9     | Identify the primary and secondary outcomes including definition of endpoints                                                                                    | 4                            |
| Study risk of bias assessment    | 10    | Provides how risk of bias was evaluated in the included studies and the criteria used in the evaluation                                                          | 4-5                          |
| Statistical analysis             | 11    | Describe methods used to synthesize results, assess the presence and degree of heterogeneity and the software package used in the analysis                       | 5                            |
| Certainty assessment             | 12    | Describe methods used to assess certainty for outcomes                                                                                                           | 5                            |
| <b>RESULTS</b>                   |       |                                                                                                                                                                  |                              |
| Study selection                  | 13    | Describe the study selection process from the number of identified from the search to the number of studies included in the review using a flow diagram          | Page 5, Figure 1             |
| Study characteristics            | 14    | Cite each included study and present its characteristics                                                                                                         | 5-6                          |
| Risk of bias in included studies | 15    | Provides assessments of risk of bias for each included study                                                                                                     | 6                            |
| outcomes                         | 16    | Provides primary and secondary outcomes using appropriate structured tables or plots.                                                                            | 6-7                          |

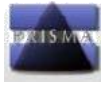

## PRISMA 2020 CHECKLIST

| Section and Topic         | Item # | Checklist item                                                                                                                                                               | Location where item is reported |
|---------------------------|--------|------------------------------------------------------------------------------------------------------------------------------------------------------------------------------|---------------------------------|
| <b>DISCUSSION</b>         |        |                                                                                                                                                                              |                                 |
| Discussion                | 17a    | Provide a general interpretation of the results                                                                                                                              | 7                               |
|                           | 17b    | Compare the review to previously published review s and their limitations. It also provides an explanation on the importance of this review in overcoming those limitations. | 7                               |
|                           | 17c    | Provide possible reasons of the review outcomes by providing previous evidence.                                                                                              | 8                               |
|                           | 17d    | Discuss implications of the review results in current practice and future research.                                                                                          | 8                               |
| <b>LIMITATIONS</b>        |        |                                                                                                                                                                              |                                 |
| Limitations               | 18     | Discuss certain limitations of this review and w ays to overcome those limitations                                                                                           | 8-9                             |
| <b>CONCLUSION</b>         |        |                                                                                                                                                                              |                                 |
| Conclusion                | 19     | Summarize review outcome by draw ing conclusions                                                                                                                             | 9                               |
| <b>OTHER INFORMATION</b>  |        |                                                                                                                                                                              |                                 |
| Registration and protocol | 19     | Provided registration information of the review and how to assess review protocol                                                                                            | 4                               |

FROM: Page MJ, McKenzie JE, Bossuyt PM, Boutron I, Hoffmann TC, Mulrow CD, et al. The PRISMA 2020 statement: an updated guideline for reporting systematic review s. BMJ 2021;372:n71. doi: 10.1136/bmj.n71

For more information, visit: <http://www.prisma-statement.org/>

**Supplemental Table 2: Complex artery lesion classification**

| Studies               | Complex artery lesions                                                                                                                                                                                                                                                                                                                                                                                                                                                                                                                                                                                                                                                           |
|-----------------------|----------------------------------------------------------------------------------------------------------------------------------------------------------------------------------------------------------------------------------------------------------------------------------------------------------------------------------------------------------------------------------------------------------------------------------------------------------------------------------------------------------------------------------------------------------------------------------------------------------------------------------------------------------------------------------|
| HOME DES IVUS         | Defined as lesion type B2 and C according to the American Heart Association, proximal left anterior descending artery, left main disease, reference vessel diameter <2.5 mm, lesion length >20 mm and in-stent restenosis                                                                                                                                                                                                                                                                                                                                                                                                                                                        |
| Kim et al.            | <b>Long lesion requiring a stent <math>\geq 28</math> mm in length</b>                                                                                                                                                                                                                                                                                                                                                                                                                                                                                                                                                                                                           |
| AVIO                  | Complex lesions which were defined as one of the following: long lesions (>28 mm); chronic total occlusion, ie, a total occlusion of duration more than 3-months; <b>lesions involving a bifurcation; small vessels (<math>\leq 2.5</math>mm) and patients requiring 4 or more stents.</b>                                                                                                                                                                                                                                                                                                                                                                                       |
| AIR-CTO               | Patients with at least one CTO lesion (defined as TIMI grade 0 and occlusion duration >3 months) that had been successfully recanalized (defined as a wire-crossed CTO lesion and at the distal true lumen according to angiograms)                                                                                                                                                                                                                                                                                                                                                                                                                                              |
| Tan et al.            | Unprotected left main coronary artery lesion                                                                                                                                                                                                                                                                                                                                                                                                                                                                                                                                                                                                                                     |
| CTO-IVUS              | Complex lesions were defined as chronic total occlusion                                                                                                                                                                                                                                                                                                                                                                                                                                                                                                                                                                                                                          |
| Liu et al.            | Defined as unprotected left main coronary artery lesions (defined as at least 50% stenosis in the left main coronary artery from visual assessment)                                                                                                                                                                                                                                                                                                                                                                                                                                                                                                                              |
| IVUS-XPL              | Complex coronary lesions were defined as long coronary lesion ( <b>implanted stent <math>\geq 28</math> mm in length</b> )                                                                                                                                                                                                                                                                                                                                                                                                                                                                                                                                                       |
| ULTIMATE              | Unprotected left main disease, long lesions, chronic total occlusion, and complex bifurcation lesions                                                                                                                                                                                                                                                                                                                                                                                                                                                                                                                                                                            |
| RENOVATE-COMPLEX- PCI | Complex coronary-artery lesions were defined as true bifurcation lesions according to the Medina classification system with a side-branch diameter of at least 2.5 mm; a chronic total occlusion; unprotected left main coronary artery disease; long coronary-artery lesions that would involve an expected stent length of at least 38 mm; multivessel PCI involving at least two major epicardial coronary arteries being treated at the same time; a lesion that would necessitate the use of multiple stents (at least three planned stents); a lesion involving in-stent restenosis; a severely calcified lesion; or ostial lesions of a major epicardial coronary artery. |

**Supplemental Table 3: Major adverse cardiac events (MACE) per each study**

| Studies                      | MACE                                                                                              |
|------------------------------|---------------------------------------------------------------------------------------------------|
| HOME DES<br>IVUS             | Not defined                                                                                       |
| Kim et al.                   | Composite of cardiac death, MI, stent thrombosis, or ischemia driven repeat revascularization     |
| AVIO                         | Composite of any cardiac death, MI or ischemia driven repeat revascularization.                   |
| AIR-CTO                      | Composite of cardiac death, MI, or ischemia driven repeat revascularization                       |
| Tan et al.                   | Composite of death, non-fatal MI, and ischemia driven repeat revascularization                    |
| CTO-IVUS                     | Composite of death, MI, or ischemia driven repeat revascularization                               |
| Liu et al.                   | Composite of cardiac death, MI, or ischemia driven repeat revascularization                       |
| IVUS-XPL                     | Composite of cardiac death, target lesion–related MI, or ischemia driven repeat revascularization |
| ULTIMATE                     | Composite of cardiac death, target-vessel related MI or ischemia driven repeat revascularization  |
| RENOVATE-<br>COMPLEX-<br>PCI | Composite of cardiac death, target-vessel MI, or ischemia driven repeat revascularization         |

MI: myocardial infarction

**Supplemental Table 4: Myocardial infarction (MI) definition per each study**

|                            |                                                                                                                                                                                                                                                                                                                                                                                                                                                                                                                                                                                                                                                                                                                                                                                                                                                                                          |
|----------------------------|------------------------------------------------------------------------------------------------------------------------------------------------------------------------------------------------------------------------------------------------------------------------------------------------------------------------------------------------------------------------------------------------------------------------------------------------------------------------------------------------------------------------------------------------------------------------------------------------------------------------------------------------------------------------------------------------------------------------------------------------------------------------------------------------------------------------------------------------------------------------------------------|
| <b>HOME DES IVUS</b>       | Not defined                                                                                                                                                                                                                                                                                                                                                                                                                                                                                                                                                                                                                                                                                                                                                                                                                                                                              |
| <b>Kim et al.</b>          | Myocardial infarction was defined as the presence of clinical symptoms, electrocardiographic changes, or abnormal imaging findings of myocardial infarction combined with an increase in creatine kinase myocardial band fraction to greater than 3X the upper limit of the normal range or an increase in troponin T/troponin I to more than the 99th percentile of the upper normal limit, unrelated to an interventional procedure                                                                                                                                                                                                                                                                                                                                                                                                                                                    |
| <b>AVIO Trial</b>          | Not defined                                                                                                                                                                                                                                                                                                                                                                                                                                                                                                                                                                                                                                                                                                                                                                                                                                                                              |
| <b>AIR-CTO</b>             | Periprocedural MI (PMI) was diagnosed when the plasma level of troponin I/T increased to >3 times the upper reference limit (URL) in no fewer than two blood samples. Subsequent MI was defined as CK-MB >threefold the URL                                                                                                                                                                                                                                                                                                                                                                                                                                                                                                                                                                                                                                                              |
| <b>Tan et al.</b>          | non-fatal myocardial infarction                                                                                                                                                                                                                                                                                                                                                                                                                                                                                                                                                                                                                                                                                                                                                                                                                                                          |
| <b>CTO-IVUS</b>            | MI was defined as the presence of clinical symptoms, electrocardiographic changes, or abnormal imaging findings associated with MI combined with an increase in creatine kinase-MB above the upper normal limit or troponin T/I greater than the 99th percentile of the upper normal limit, unrelated to an interventional procedure                                                                                                                                                                                                                                                                                                                                                                                                                                                                                                                                                     |
| <b>Liu et al.</b>          | Periprocedural MI was confirmed if creatine kinase–myocardial band (CK-MB) increased >10× the upper reference limit (URL) or presenting with any of the following symptoms:<br><b>(1) newly appeared pathological Q waves in ≥2 contiguous leads or left bundle branch block</b><br><b>(2) imaging evidence indicating new loss of viable myocardium, or</b><br><b>(3) CK-MB increased &gt;5× the URL only but presented with new occlusion or severe stenosis proven by angiography.</b>                                                                                                                                                                                                                                                                                                                                                                                                |
| <b>IVUS-XPL</b>            | MI was defined as presence of clinical symptoms, electrocardiographic changes, or abnormal imaging findings of MI, combined with an increase in the creatine kinase-MB fraction above the upper normal limits or an increase in troponin T or troponin I to a level greater than the 99th percentile of the upper normal limit                                                                                                                                                                                                                                                                                                                                                                                                                                                                                                                                                           |
| <b>ULTIMATE</b>            | Protocol-defined peri-procedural MI was defined as a peak creatine kinase-MB <b>≥10 times the upper limit of normal measured within 72 h after the procedure or ≥5 times the upper limit of normal plus:</b><br>1) new pathological Q waves in 2 or more contiguous leads or new left bundle branch block;<br>2) angiographically documented coronary artery or graft occlusion or new severe stenosis with thrombosis; or<br>3) imaging evidence of new regional wall motion abnormality or new loss of viable myocardium.<br>Spontaneous MI (after 72 h) was defined as a clinical syndrome consistent with MI with CK-MB or troponin >1 time the URL and new ST-segment elevation or depression, or other findings as mentioned earlier in the text. All MIs were considered to be target-vessel MI unless there was clear evidence that they were attributable to a nontarget vessel |
| <b>RENOVATE COMPLEXPCI</b> | Target-vessel–related MI, spontaneous myocardial infarction, Procedure-related myocardial infarction and non–target-vessel–related myocardial infarction                                                                                                                                                                                                                                                                                                                                                                                                                                                                                                                                                                                                                                                                                                                                 |

**Supplemental Table 5:** Risk of bias of the individual studies by Cochrane risk assessment tool

|                                                                           | HOME DES<br>IVUS 2010 | KIM ET AL.<br>2013 | AVIO<br>2013 | AIR-CTO<br>2015 | TAN ET<br>AL. 2015 | CTO-IVUS<br>2015 | LIU ET AL.<br>2019 | IVUS-XPL<br>2020 | ULTIMATE<br>2021 | RENOVATE-COMPLEX-<br>PCI 2023 |
|---------------------------------------------------------------------------|-----------------------|--------------------|--------------|-----------------|--------------------|------------------|--------------------|------------------|------------------|-------------------------------|
| <b>Random sequence generation</b> ( <i>Selection bias</i> )               | +                     | +                  | +            | +               | +                  | +                | +                  | +                | +                | +                             |
| <b>Allocation concealment</b> ( <i>Selection bias</i> )                   | +                     | +                  | +            | +               | ?                  | +                | +                  | +                | +                | +                             |
| <b>Blinding of participants and personnel</b> ( <i>Performance bias</i> ) | -                     | -                  | -            | -               | -                  | -                | -                  | -                | -                | -                             |
| <b>Blinding of outcome assessment</b> ( <i>Detection bias</i> )           | ?                     | +                  | +            | +               | ?                  | +                | +                  | +                | +                | +                             |
| <b>Incomplete outcome data</b> ( <i>Attrition bias</i> )                  | +                     | +                  | +            | +               | +                  | +                | +                  | +                | +                | +                             |
| <b>Selective reporting</b> ( <i>Reporting bias</i> )                      | +                     | +                  | +            | +               | +                  | +                | +                  | +                | +                | +                             |
| <b>Other sources of bias</b>                                              | +                     | +                  | +            | +               | +                  | +                | +                  | +                | +                | +                             |

 = Low risk of bias
  = Risk of bias
  = Unclear

Supplemental Figure 1: Funnel plot for MACE

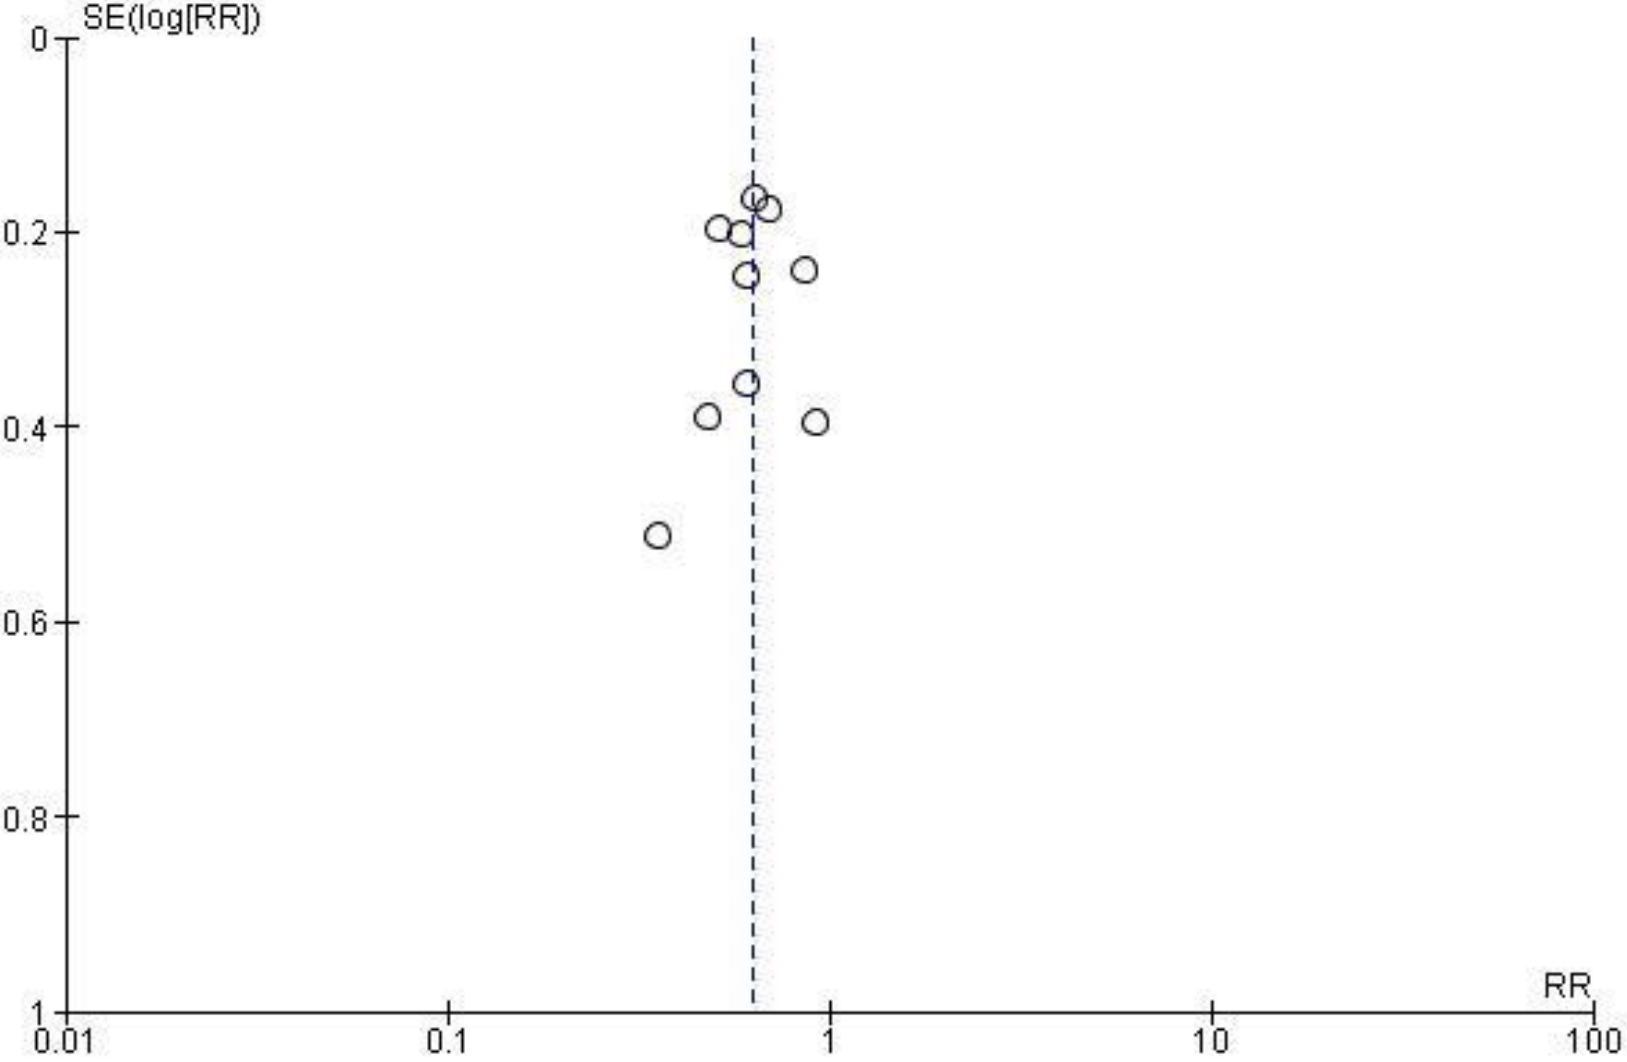





## Supplemental Figure 2

### Major adverse cardiac events (MACE) excluding studies with high risk of bias

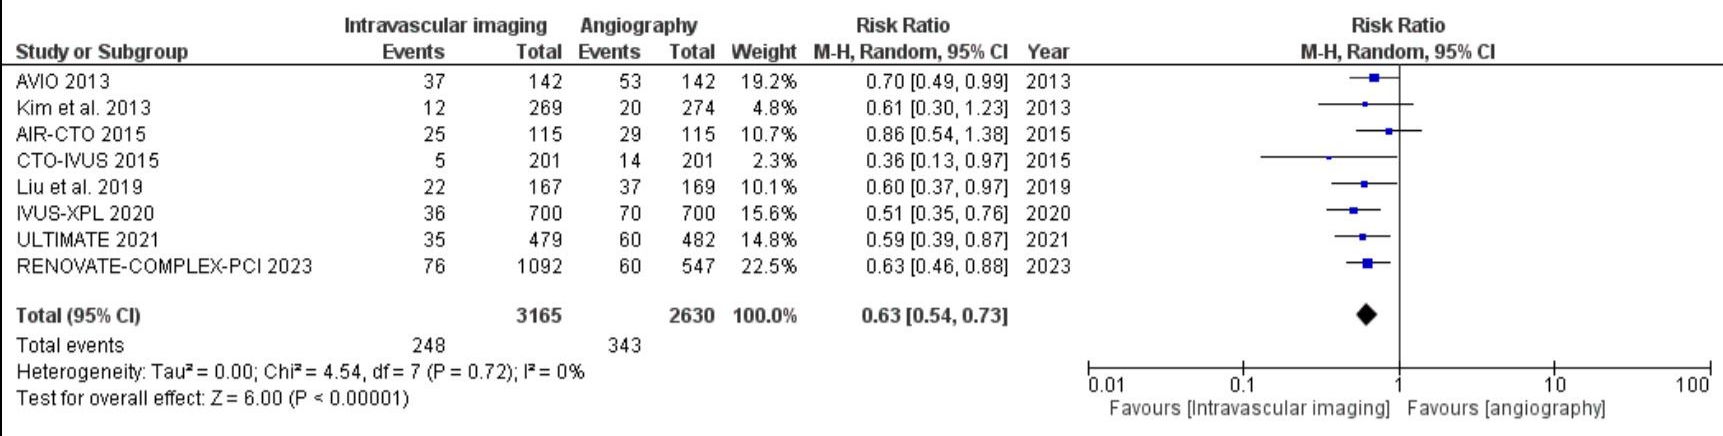

### MACE excluding studies using OCT

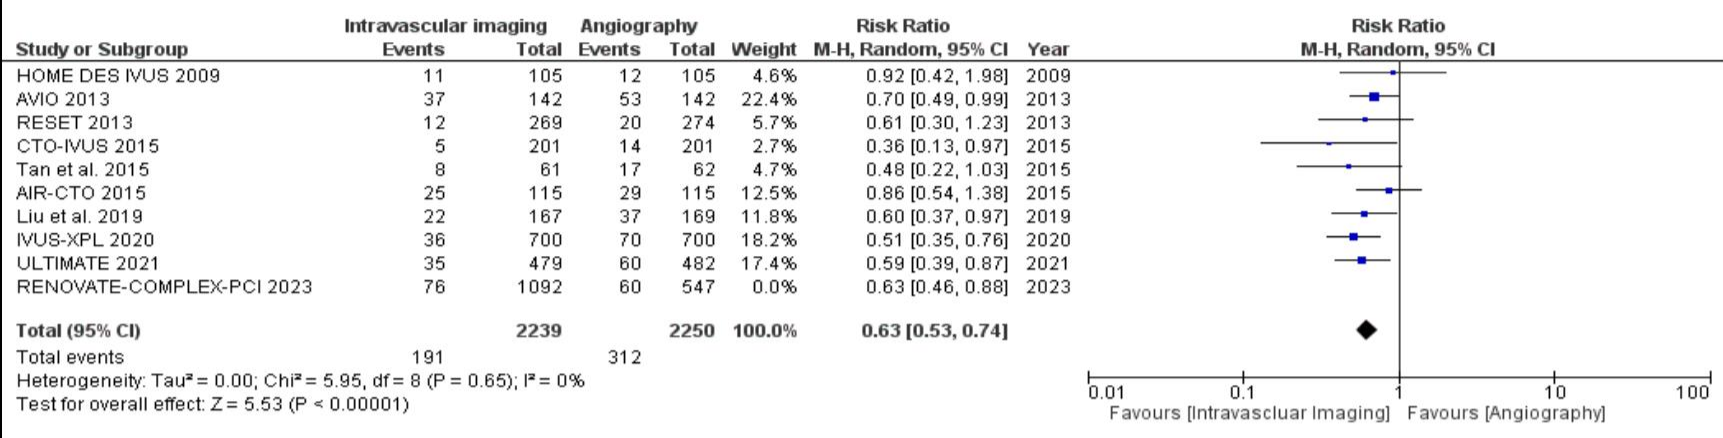

### MACE including studies with consistent MACE definitions

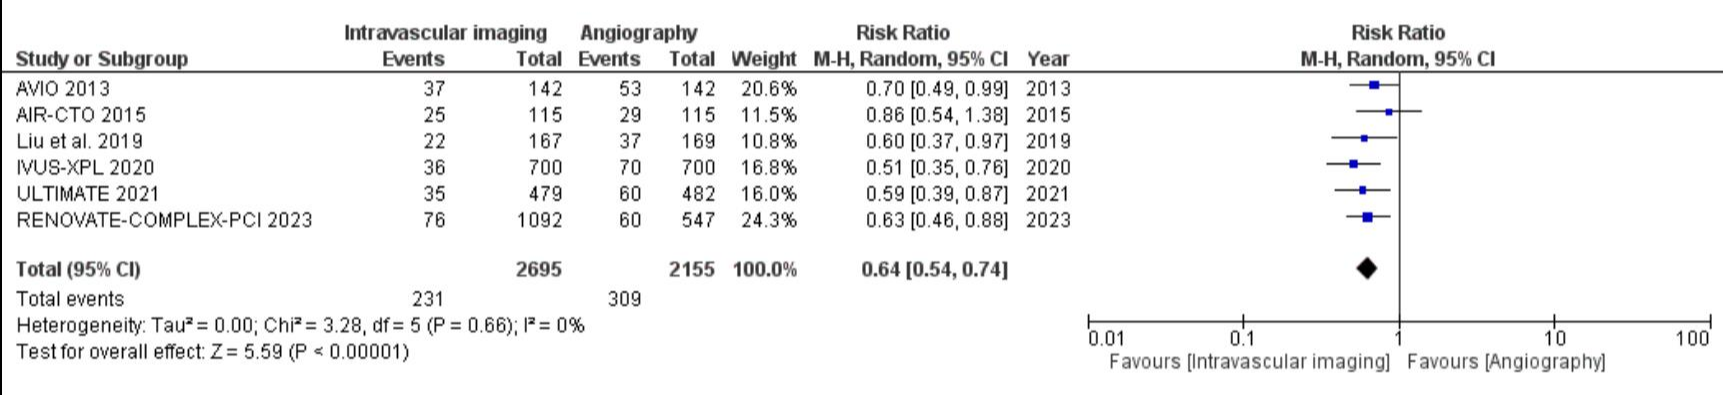

### MACE at 1 year follow-up

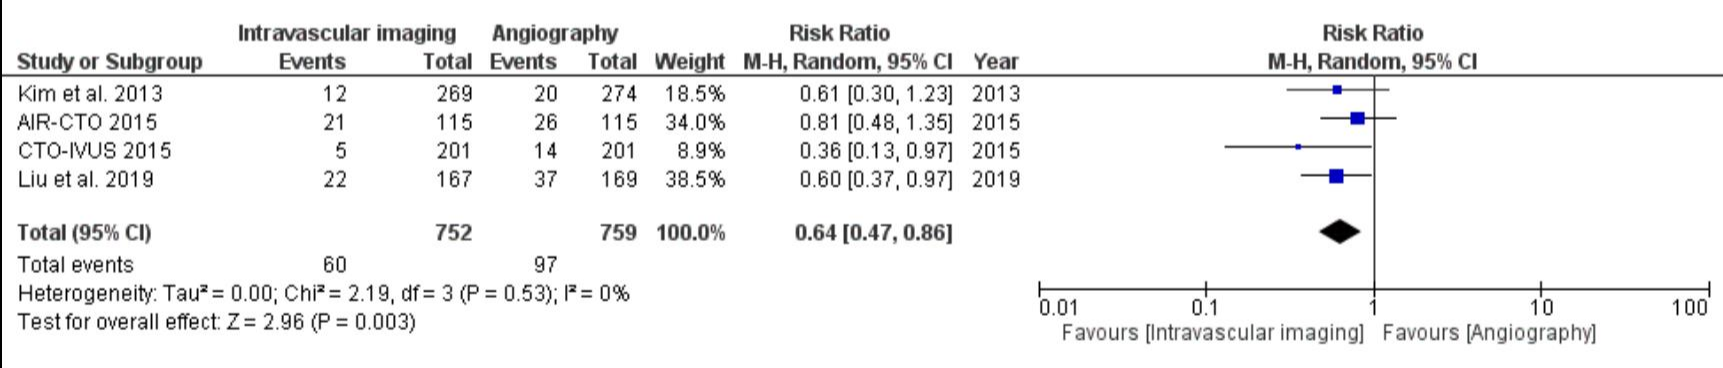

### MACE at 2 years follow-up

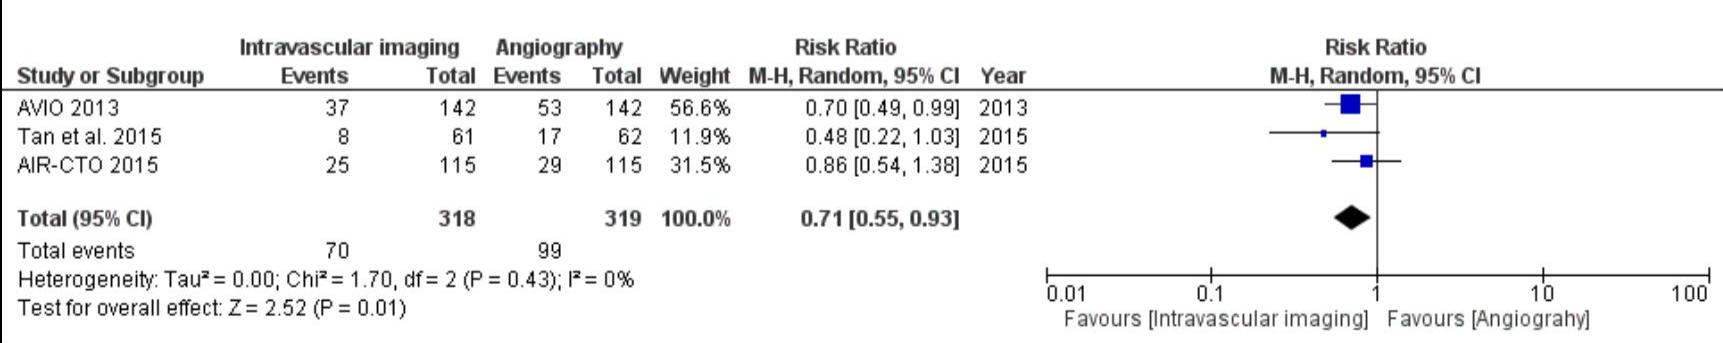

### MACE including studies exclusively using second generation DES

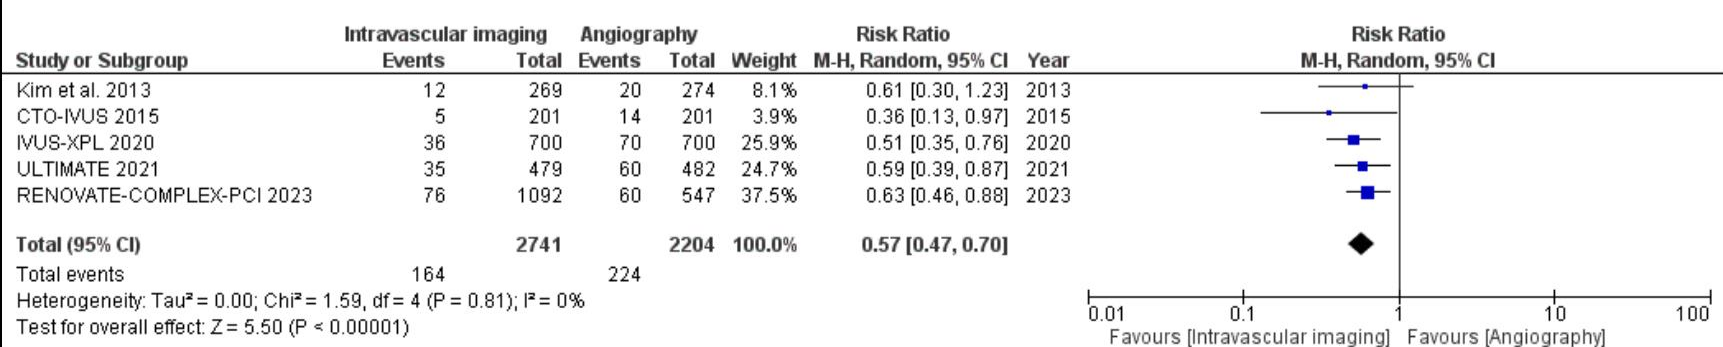

### Supplemental Figure 3

#### Major adverse cardiac events (MACE) including studies reporting left main coronary artery (LMCA) PCI

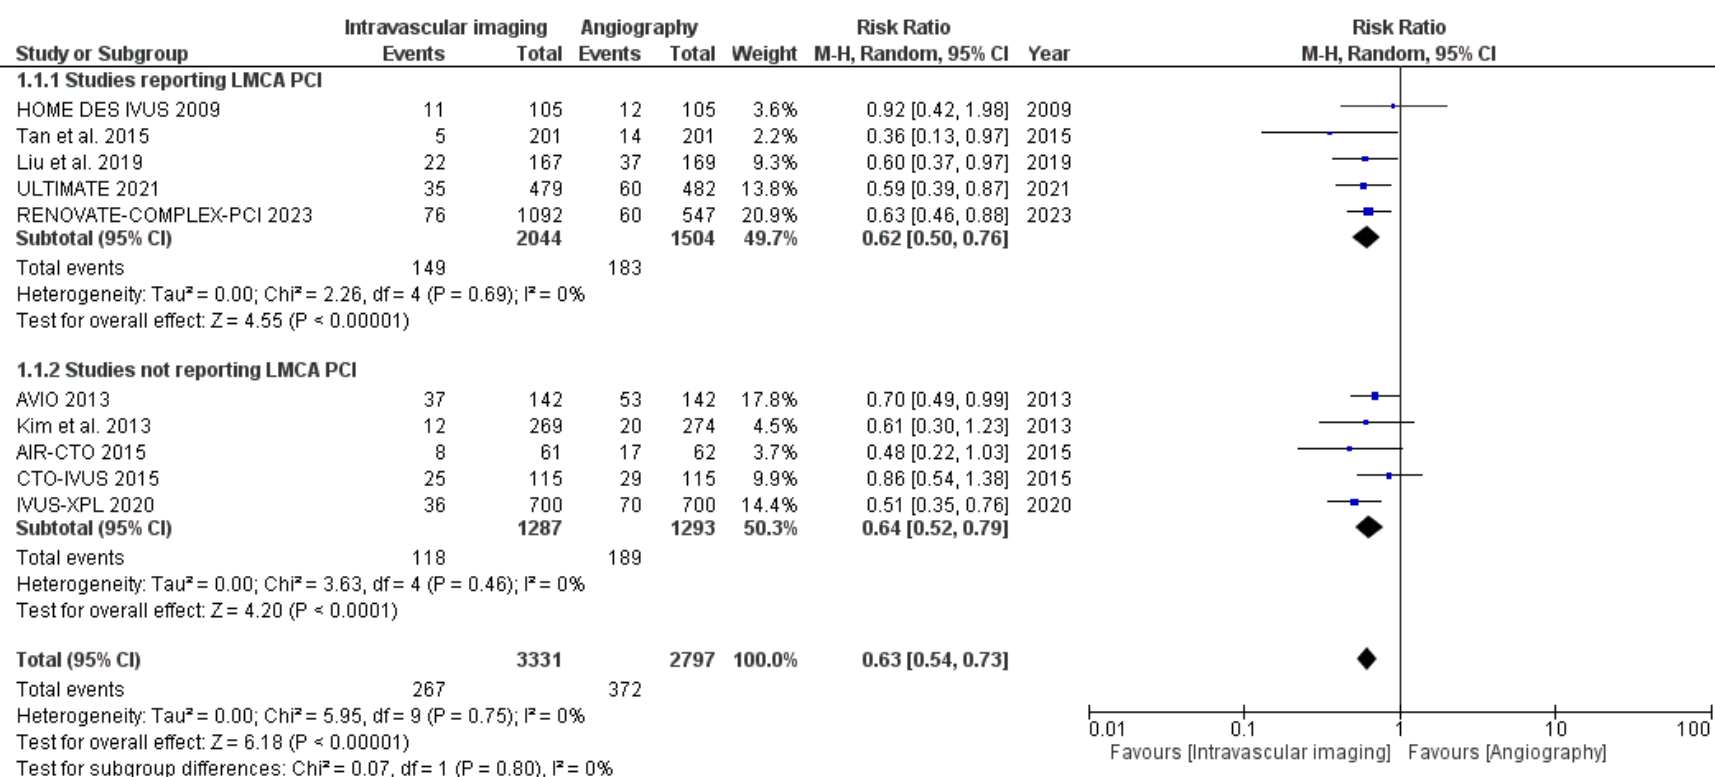

#### MACE including studies reporting chronic total occlusion (CTO) PCI

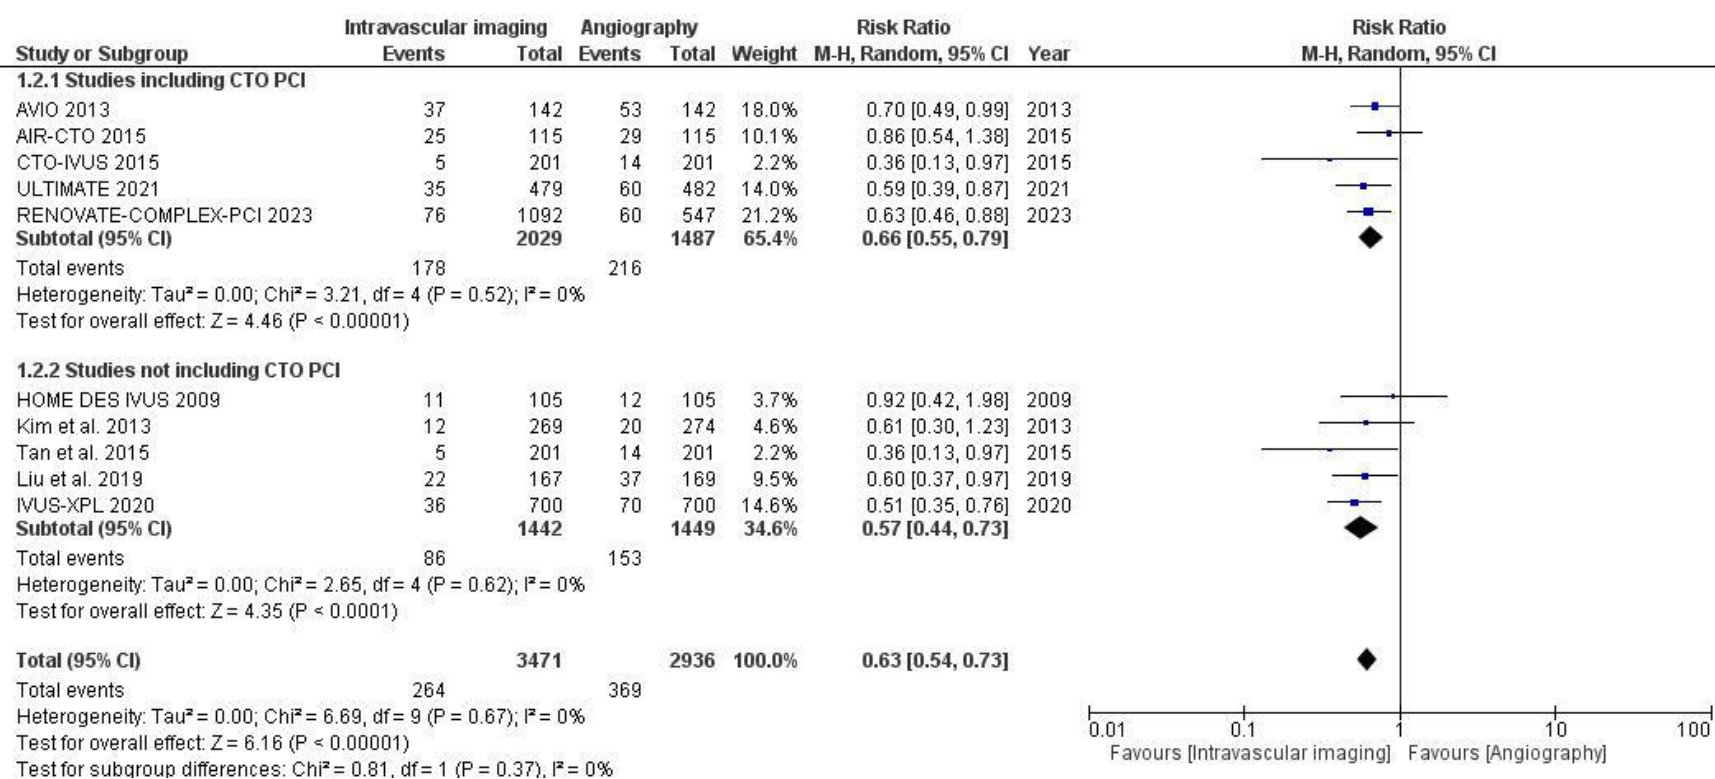

Supplement: 40119_2024_364_MOESM1_ESM.pdf [file 40119_2024_364_MOESM1_ESM.pdf]
